# Supplementary material
Source: ML conference proceedings conference paper supplement (https://proceedings.neurips.cc/paper_files/paper/2022/hash/b9c2e8a0bbed5fcfaf62856a3a719ada-Abstract.html)
Supplement: Supplementary file 1 [file b9c2e8a0bbed5fcfaf62856a3a719ada-Supplemental-Conference.pdf]

## 1 A Derivation of the overall objective

2 The goal requires us to not only model the dependence between  $x$  and  $(w, z)$  for latent representation  
 3 learning and data generation, but also model the dependence between  $y$  and  $w$  for controlling the  
 4 property. We propose to achieve this by maximizing the joint log likelihood  $p(x, y)$  via its variational  
 5 lower bound. Given an approximate posterior  $q(z, w|x, y)$ , we can use the Jensen's equality to obtain  
 6 the variational lower bound of  $\log p(x, y)$  as:

$$\begin{aligned} \log p(x, y) &= \log \mathbb{E}_{q(z, w|x, y)}[p(x, y, w, z)/q(z, w|x, y)] \\ &\geq \mathbb{E}_{q(z, w|x, y)}[\log p(x, y, w, z)/q(z, w|x, y)]. \end{aligned} \quad (1)$$

7 The joint likelihood  $\log p(x, y, w, z)$  can be further decomposed as  $\log p(x, y|z, w) + \log p(z, w)$ .  
 8 Two assumptions apply to our task: (1)  $x$  and  $y$  are conditionally independent given  $w$  (i.e.,  $x \perp y|w$ )  
 9 since  $w$  only captures information from  $y$ ; (2)  $z$  is independent from  $w$  and  $y$ , equivalent to  $y \perp z|w$ .  
 10 This gives us  $x \perp y|(w, z)$ , suggesting that  $\log p(x, y|w, z) = \log p(x|w, z) + \log p(y|w, z) =$   
 11  $\log p(x|w, z) + \log p(y|w)$ .

12 *Proof.* Proof of  $x \perp y|(w, z)$  given  $x \perp y|w$ ,  $y \perp z$ ,  $y \perp w$ .

13 Firstly we will prove that given  $z \perp y$  and  $z \perp w$ , we have  $y \perp z|w$ . Based on the Bayesian rule, we  
 14 have:

$$p(y, z|w) = p(z|y, w)p(y|w) = p(y|z, w)p(z|w) \quad (2)$$

15 Since  $z \perp y$  and  $z \perp w$ , then we have  $p(z|w) = p(z)$  and  $p(z|w, y) = p(z)$ . As a result, both sides  
 16 of Eq. 2 can be cancelled as  $p(z)p(y|w) = p(y|z, w)p(z)$ , causing  $p(y|w) = p(y|z, w)$ . We multiply  
 17  $p(z|w)$  then we have  $p(z|w)p(p(y|w) = p(y, z|w)$ . Thus, we have  $y \perp z|w$ .

18 Then, given that  $x \perp y|w$ ,  $y \perp z$ ,  $y \perp w$  and  $y \perp z|w$ , based on the Bayesian rule, we have  
 19  $p(x, y|w, z) = p(x|y, z, w)p(y|z, w) = p(x|y, z, w)p(y|z, w)$ . This equation can be cancelled as  
 20  $p(y|w)p(x|z, w) = p(x|y, z, w)p(y|w)$  given  $y \perp z|w$  and  $y \perp x|w$ . Then we have  $p(x|z, w) =$   
 21  $p(x|y, z, w)$ , indicating that  $x \perp y|(w, z)$ .  $\square$

22 Consequently, we can write the joint log-likelihood and maximize its lower bound as:

$$\begin{aligned} \log p_{\theta, \gamma}(x, y, w, z) &= \log p_{\theta}(x|w, z) + \log p(w, z) + \log p_{\gamma}(y|w) \\ &= \log p_{\theta}(x|w, z) + \log p(w, z) + \sum_{i=1}^m \log p_{\gamma}(y_i|w'_i), \end{aligned} \quad (3)$$

23 where we define  $w'_i$  as the set of values in  $w$  that contribute to the  $i$ -th property to bridge the mapping  
 24  $w \rightarrow y$  and allow property controlling.

25 *Proof.* Proof of  $\log p_{\gamma}(y|w) = \sum_{i=1}^m \log p_{\gamma}(y_i|w'_i)$ .

26 Since  $w'$  aggregates all information in  $w$ , we have  $\log p_{\gamma}(y|w) = \log p_{\gamma}(y|w')$ . Also, since prop-  
 27 erties in  $y$  are independent conditioning on  $w'$ ,  $\log p_{\gamma}(y|w) = \log p_{\gamma}(y|w') = \sum_{i=1}^m \log p_{\gamma}(y_i|w'_i) =$   
 28  $\sum_{i=1}^m \log p_{\gamma}(y_i|w'_i)$ .  $\square$

29 Given  $q_{\phi}(w, z|x, y) = q_{\phi}(w, z|x) = q_{\phi}(w|x) \cdot q_{\phi}(z|x)$  since the information of  $y$  is included in  $x$ ,  
 30 we rewrite the aforementioned joint probability as the form of the Bayesian variational inference:

$$\begin{aligned} \mathcal{L}_1 &= -\mathbb{E}_{q_{\phi}(w, z|x)}[\log p_{\theta}(x|w, z)] - \mathbb{E}_{q_{\phi}(w|x)}[\log p_{\gamma}(y|w)] \\ &\quad + D_{KL}(q_{\phi}(w, z|x)||p(w, z)). \end{aligned} \quad (4)$$

31 Since the objective function in Eq. (3) does not achieve our assumption that  $z$  is independent from  $w$   
 32 and  $y$ , we decompose the KL-divergence in Eq. (4) as:

$$\begin{aligned} \mathbb{E}_{p(x)}[D_{KL}(q_{\phi}(w, z|x)||p(w, z))] &= D_{KL}(q_{\phi}(w, z, x)||q(w, z)p(x)) \\ &\quad + D_{KL}(q(w, z)||\prod_{i,j} q(z_i)q(w_j)) \\ &\quad + \sum_i D_{KL}(q(z_i)||p(z_i)) + \sum_j D_{KL}(q(w_j)||p(w_j)), \end{aligned} \quad (5)$$

where  $z_i$  is the  $i$ -th variable of the latent vector  $z$  and  $w_j$  is the  $j$ -th variable of the latent vector  $w$ . Then we can further decompose the total correlation term in Eq. (5) as:

$$D_{KL}(q(w, z) || \prod_{i,j} q(z_i)q(w_j)) = D_{KL}(q(z, w) || q(z)q(w)) \\ + D_{KL}(q(w) || \prod_i q(w_i)) + D_{KL}(q(z) || \prod_i q(z_i)) \quad (6)$$

Thus, we can add a penalty of the first term of Eq. 6 to enforce the independence between  $z$  and  $w$  and another penalty to the second term to enforce the independence of variables in  $w$ . This is the second term of our final objective with the hyper-parameter  $\rho$  to penalize the term:

$$\mathcal{L}_2 = \rho_1 \cdot D_{KL}(q(z, w) || q(z)q(w)) + \rho_2 \cdot D_{KL}(q(w) || \prod_i q(w_i)), \quad (7)$$

$\mathcal{L}_1 + \mathcal{L}_2$  is the overall objective of our model. Together with the third term as illustrated in the main text:

$$\mathcal{L}_3 = -\mathbb{E}_{w' \sim p(w')} [\mathcal{N}(y | f(w'; \gamma), \Sigma)] + \|Lip(\bar{f}(w'; \gamma)[j]) - 1\|_2 \quad (8)$$

Our final objective is  $\mathcal{L}_1 + \mathcal{L}_2 + \mathcal{L}_3$ .

## B Proof of Theorem 4.1

*Proof.* We will prove Theorem 4.1 by taking the derivative of the objective function in both Eq. (9) and Eq. (10) regarding  $w'$ . Suppose  $g_1(w')$  and  $g_2(w')$  are objective function of Eq. (9) and Eq. (10), respectively. To simplify the proof, rewrite  $g_1(w')$  and  $g_2(w')$  in the matrix form as:

$$g_1(w') = -(\hat{y} - f(w'; \gamma))^T \Sigma^{-1} (\hat{y} - f(w'; \gamma)) \\ g_2(w') = -(\hat{y} - f(w'; \gamma))^T (\hat{y} - f(w'; \gamma))$$

Then we take the derivative of  $g_1(w')$  on  $w'$ :

$$\frac{\partial g_1(w')}{\partial w'} = \frac{\partial g_1(w')}{\partial f(w'; \gamma)} \frac{\partial f(w'; \gamma)}{\partial w'} = 0$$

Since  $f(w'; \gamma)$  is the prediction function, it is not necessary for  $f(w'; \gamma)$  to reach maximum or minimum value at  $w'$  all the time. And the above equation can always been satisfied if  $\frac{\partial g_1(w')}{\partial f(w'; \gamma)} = 0$ . Then we have:

$$\frac{\partial g_1(w')}{\partial f(w'; \gamma)} = 0 \\ \rightarrow 2(\hat{y} - f(w'; \gamma))^T \Sigma^{-1} = 0 \\ \rightarrow (\hat{y} - f(w'; \gamma))^T = 0 \\ \hat{y}_i = f(w'; \gamma)[i], i = 1, \dots, m, \quad (9)$$

assuming  $\Sigma$  is positive definite. Similarly for  $g_2(w')$ , we have:

$$\frac{\partial g_2(w')}{\partial f(w'; \gamma)} = 2(\hat{y} - f(w'; \gamma)) = 0 \\ \hat{y}_i = f(w'; \gamma)[i], i = 1, \dots, m \quad (10)$$

Thus, Eq 9 and Eq 10 share the same set of solution, suggesting that the solution to Eq. (10) is also a solution to Eq. (9).  $\square$

## C The Overall Implementation

In this section, we introduce the overall implementation of the aforementioned distributions to model the whole learning and generation process. All experiments are conducted on the 64-bit machine with a NVIDIA GPU, NVIDIA GeForce RTX 3090.

Table 1: Implementation details of CorrVAE on image data (dSprites and Pendulum). Conv represents the layer of convolutional neural network; ConvTranspose represents the transposed convolutional layer; ReLU represents the Rectified Linear Unit activation function; FC is the fully connected layer.

| Layer  | Object encoder | Property encoder | Object decoder     |
|--------|----------------|------------------|--------------------|
| Input  | $x$ (image)    | $x$ (image)      | $z$ and $w$        |
| Layer1 | Conv+ReLU      | Conv+ReLU        | FC+ReLU            |
| Layer2 | Conv+ReLU      | Conv+ReLU        | FC+ReLU            |
| Layer3 | Conv+ReLU      | Conv+ReLU        | FC+ReLU            |
| Layer4 | Conv+ReLU      | Conv+ReLU        | ConvTranspose+ReLU |
| Layer5 | FC+ReLU        | FC+ReLU          | ConvTranspose+ReLU |
| Layer6 | FC+ReLU        | FC+ReLU          | ConvTranspose+ReLU |
| Layer7 | FC             | FC               | ConvTranspose+ReLU |
| Output | $z$            | $w$              | $x$ (image)        |

Table 2: Implementation details of CorrVAE on molecular data (QAC and QM9). GGNN represents the gated graph neural network; ReLU represents the Rectified Linear Unit activation function; FC is the fully connected layer.

| Layer  | Object encoder | Property encoder | Object decoder              |
|--------|----------------|------------------|-----------------------------|
| Input  | $G$ (molecule) | $G$ (molecule)   | $z$ and $w$                 |
| Layer1 | FC+ReLU        | FC+ReLU          | FC+ReLU                     |
| Layer2 | GGNN+ReLU      | GGNN+ReLU        | GGNN+ReLU                   |
| Layer3 | GGNN+ReLU      | GGNN+ReLU        | GGNN+ReLU                   |
| Layer4 | FC             | FC               | FC (for both node and edge) |
| Output | $z$            | $w$              | $G$ (molecule)              |

We have two encoders to model the distribution  $q(w, z|x)$ , and two decoders to model  $p(y|w)$  and  $p(x|w, z)$  for property control and data generation, respectively. For the first objective  $\mathcal{L}_1$  (Eq. (3)), we use Multi-layer perceptrons (MLPs) together with Convolution Neural Networks (CNNs) or Graph Neural Networks (GNNs) for image or graph data, respectively, to capture the distribution over relevant random variables. For  $\mathcal{L}_2$  in Eq. (4), since both  $q(z)$  and  $q(w)$  are intractable, we use Naive Monte Carlo approximation based on a mini-batch of samples to approach  $q(z)$  and  $q(w)$  [2]. The details regarding the architecture of CorrVAE on image and molecular datasets are presented in Table 1 and Table 2, respectively. The dimension of each layer can be tuned based on different needs.

The mask layer  $M$  is formed and trained with the Gumbel Softmax function, while  $h$  function in Eq. (5) is modeled by MLPs. The  $L_1$  norm of the mask matrix is added to the objective to encourage the sparsity of the mask matrix. The invertible constraint and modeling  $p_\gamma(y|w')$  in Eq. (7) are achieved by MLPs, by which  $\tilde{f}(w'; \gamma)[j]$  is approximated with  $j = 1, 2, \dots, m$ , and  $f(w'; \gamma)[j] = \tilde{f}(w'; \gamma)[j] + w'_j$ , as in the constraint of Eq. (7). Since the function  $\tilde{f}(w'; \gamma)[j]$  approximated by MLPs contains operation of nonlinearities (e.g., ReLU, tanh) and linear mappings, then we have  $Lip(\tilde{f}(w'; \gamma)[j]) < 1$  if  $\|W_l\|_2 < 1$  for  $l \in L$ , where  $W_l$  is the weights of the  $l$ -th layer in  $\tilde{f}(w'; \gamma)[j]$ .  $\|\cdot\|$  is the spectral norm and  $L$  is the number of layers in MLPs. To apply the above constraints, we use the spectral normalization for each layer of MLPs [1].

For generating data with desired properties, we borrow the weighted-sum strategy to solve the multi-objective optimization problem in Eq. (11) to obtain the corresponding  $w^*$ . We formalize the inequality constraint in Eq. (11) into the KKT conditions. Then  $w^*$  serves as the input to the generator of the trained model to generate objects with desired properties.

The pre-trained models to predict properties given an image are trained on all data from dSprites dataset, and the structure of pre-trained models is as below (Table 3):

## D Quantitative evaluation

The quality of generated molecules based on QAC and QM9 datasets is evaluated by *validity*, *novelty* and *uniqueness*. The results have been shown in Table 4. The quality of generated images is evaluated by *negative log probability* ( $-\log\text{Prob}$ ) and *FID* as shown in Figure 5.

Table 3: Implementation details of pre-trained models on dSprites dataset to predict properties  $y$ . Conv represents the layer of convolutional neural network; ConvTranspose represents the transposed convolutional layer; ReLU represents the Rectified Linear Unit activation function; FC is the fully connected layer.

| Layer  | Model     |
|--------|-----------|
| Input  | Conv+ReLU |
| Layer1 | Conv+ReLU |
| Layer2 | Conv+ReLU |
| Layer3 | FC+ReLU   |
| Layer4 | FC        |
| Output | $y$       |

Table 4: Generation quality of each method regarding validity, novelty and uniqueness on QAC dataset.

| 2*Method | QAC      |         |            | QM9      |         |            |
|----------|----------|---------|------------|----------|---------|------------|
|          | validity | novelty | uniqueness | validity | novelty | uniqueness |
| Semi-VAE | 100%     | 100%    | 37.5%      | 100%     | 100%    | 82.5%      |
| PCVAE    | 100%     | 100%    | 89.2%      | 100%     | 99.6%   | 92.2%      |
| CorrVAE  | 100%     | 100%    | 44.5%      | 100%     | 91.2%   | 23.8%      |

Table 5: Generation quality of each method regarding validity, novelty and uniqueness on dSprites dataset.

| Method   | $-\log\text{Prob}$ | Rec. Error | FID   |
|----------|--------------------|------------|-------|
| CSVAE    | 0.26               | 227        | 86.14 |
| Semi-VAE | 0.23               | 239        | 86.05 |
| PCVAE    | 0.23               | 222        | 85.45 |
| CorrVAE  | 0.22               | 229        | 85.17 |

Table 6: The avgMI achieved by each model on the dSprites and Pendulum datasets.

| Method   | dSprites | Pendulum |
|----------|----------|----------|
| CSVAE    | 0.1578   | 0.1099   |
| Semi-VAE | 0.0118   | 0.0223   |
| PCVAE    | 0.0119   | 0.0252   |
| CorrVAE  | 0.0404   | 0.0468   |

Table 7: CorrVAE compared to state-of-the-art methods on QAC datasets according to MSE between generated correlated properties and expected properties.

| 2*Method | QAC   |           | QM9   |           |
|----------|-------|-----------|-------|-----------|
|          | logP  | MolWeight | logP  | MolWeight |
| Semi-VAE | 15.13 | 433447.6  | 50.55 | 47365.07  |
| PCVAE    | 29.76 | 365098.7  | 2.33  | 4528.7    |
| CorrVAE  | 24.01 | 356701.5  | 2.75  | 4476.54   |

Table 8: CorrVAE compared to Bayesian optimization on dSprites and Pendulum datasets according to MSE between predicted correlated properties and true properties.

| 2*Method | dSprites |                | Pendulum       |                 |
|----------|----------|----------------|----------------|-----------------|
|          | size     | $x+y$ position | light position | shadow position |
| BO       | 0.0033   | 0.0062         | 19.2387        | 17.2858         |
| CorrVAE  | 0.0016   | 0.0066         | 15.3900        | 6.0250          |

83 We also conducted additional experiments by predicting properties with the whole  $w$  and performing  
 84 property control via Bayesian optimization. In this case  $w'$  and the mask layer are dropped. The  
 85 results that compare CorrVAE and the Bayesian optimization-based model (BO) are shown in Table 8.  
 86 Based on the results, CorrVAE achieves smaller MSE on both light position and shadow position  
 87 of Pendulum dataset. Specifically, for light position, MSE achieved by CorrVAE is 15.3900 which  
 88 is much smaller than 19.2387 obtained from the Bayesian optimization-based model. For shadow  
 89 position, MSE achieved by CorrVAE is 6.0250 which is much smaller than 17.2858 obtained from  
 90 the Bayesian optimization-based model. Besides, on dSprites dataset, CorrVAE achieves the MSE  
 91 of 0.0016 for the size which is smaller than 0.0033 obtained from the Bayesian optimization-based  
 92 model. In addition, CorrVAE achieves comparable results on  $x+y$  position with the Bayesian  
 93 optimization-based model. The results indicate that CorrVAE has better performance than the

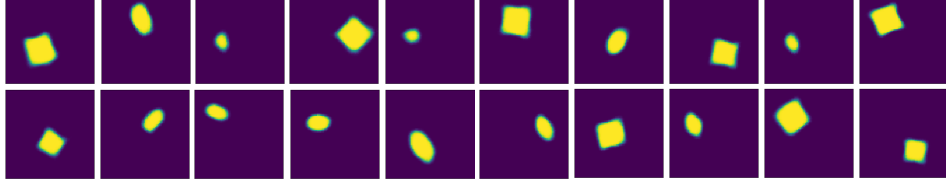

Figure 1: Visualize generated images from CorrVAE.

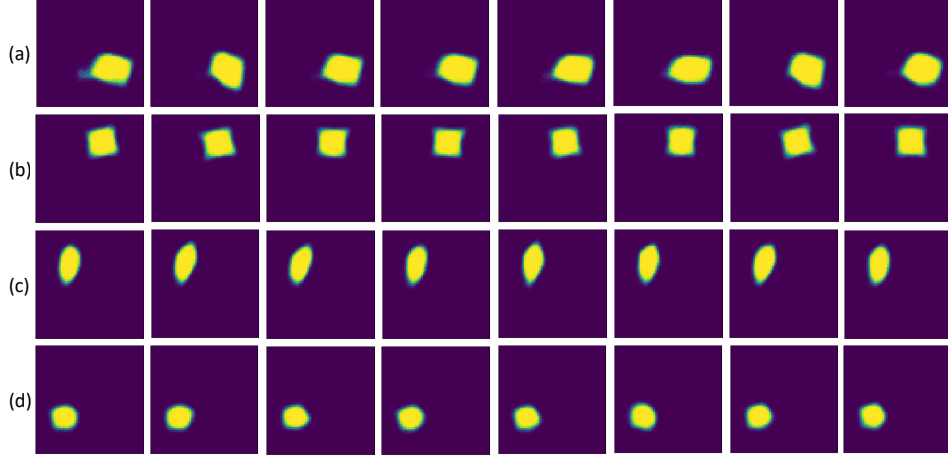

Figure 2: Show case of eight generated images in a batch corresponding to Figure 4 in the main text. (a)  $shape=1$  (square),  $size=0.9$ ,  $x\ position=0.8$ ,  $y\ position=0.8$ ,  $x+y\ position = 1.6$ ; (b)  $shape=1$  (square),  $size=0.9$ ,  $x\ position=0.6$ ,  $y\ position \in [0.3, 0.4]$ ; (c)  $shape=2$  (ellipse),  $size=0.9$ ,  $x\ position=-\infty$ ,  $y\ position=0.4$ ; (d)  $shape=2$  (ellipse),  $size=0.5$ ,  $x\ position=-\infty$ ,  $y\ position= \infty$

94 Bayesian optimization-based model on controlling independent variables (i.e., size in dSprites, light  
95 position in Pendulum) and correlated properties (shadow position in Pendulum).

## 96 E Qualitative evaluation

97 We evaluate the property controllability of our model by traversing the latent variables in  $w$  that  
98 control corresponding properties. In addition to controlling all five properties of the dSprites dataset,  
99 we also conducted a naive experiment to control three properties  $size$ ,  $x\ position$  and  $x+y\ position$   
100 (Figure 4 and Figure 3). Figure 4 shows that mask matrix learned by the model indicating latent  
101 variables that control corresponding properties. Specifically, we argue that two variables,  $w_6$  and  
102  $w_8$  can only control  $y\ position$  and  $x\ position$ , respectively, as indicated by the mask matrix learned  
103 from the training process. As shown in Figure 3 and Figure 5, if we traverse  $w_3$  that only controls  
104  $x\ position$  (Appendix Figure 4), the horizontal position of the object will move from the left to the right  
105 (Appendix Figure 3 (a)) while  $x+y\ position$  keeps unchanged but  $y\ position$  cannot be controlled  
106 since its information is not captured by  $w$  and the mask matrix.

107 In addition to traversing latent variables, we also performed multi-objective optimization on images  
108 according to different constraints of properties (Figure 5). Since we do not control  $shape$  of those  
109 images so that this property can go random in the generation process, while all other properties are  
110 well controlled by the multi-objective optimization framework.

111 Moreover, we also traverse the latent variables in  $w'$  by simultaneously traversing on latent variables  
112 in  $w$  corresponding to the associated  $w'$  and visualize how the relevant property changes in Figure 6.  
113 As is shown in Figure 6 (a), the shape of the pattern changes from ellipse to square as we traverse on  
114  $w'_1$ . In Figure 6 (b), the size of the pattern shrinks as we traverse on  $w'_2$ . In Figure 6 (c), the  $x\ position$   
115 of the pattern moves from left to right as we traverse on  $w'_3$ . In Figure 6 (d), the  $y\ position$  of the

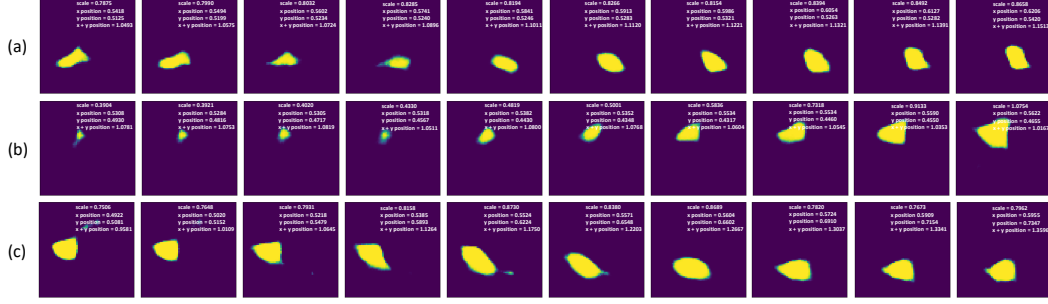

Figure 3: Generated images of corrVAE by traversing three latent variables in  $w$  for dSprites dataset according to the mask matrix (Figure 4). The corresponding properties are illustrated at the top right corner of each image. (a) Traversing on the  $w_3$  that only controls  $x$  position; (b) Traversing on the  $w_5$  that only controls  $size$  of the object; (c) Traversing on the  $w_7$  that simultaneously controls both  $x$  position and  $x+y$  position

|                | $w_1$ | $w_2$ | $w_3$ | $w_4$ | $w_5$ | $w_6$ | $w_7$ | $w_8$ |
|----------------|-------|-------|-------|-------|-------|-------|-------|-------|
| scale          | 0     | 0     | 0     | 0     | 1     | 0     | 0     | 0     |
| $x$ position   | 0     | 0     | 1     | 0     | 0     | 0     | 1     | 0     |
| $x+y$ position | 1     | 0     | 0     | 0     | 0     | 0     | 1     | 0     |

Figure 4: The mask matrix learned by the training process. Each column corresponds to one latent variable in  $w$ . Each row corresponds to a property. In our experiments setting, three properties,  $scale$ ,  $x$  position and  $x+y$  position, are handled.  $x$  position and  $x+y$  position are correlated properties

116 pattern moves from top to bottom as we traverse on  $w'_4$ . In Figure 6 (e), the  $x$  position,  $y$  position  
 117 and  $x+y$  position of the pattern simultaneously change as we traverse on  $w'_4$ , where  $x$  position moves  
 118 from left to right,  $y$  position moves from bottom to top and  $x+y$  position increase.

## 119 References

- 120 [1] J. Behrmann, W. Grathwohl, R. T. Chen, D. Duvenaud, and J.-H. Jacobsen. Invertible residual  
 121 networks. In *International Conference on Machine Learning*, pages 573–582. PMLR, 2019.
- 122 [2] R. T. Q. Chen, X. Li, R. B. Grosse, and D. K. Duvenaud. Isolating sources of disentan-  
 123 glement in variational autoencoders. In S. Bengio, H. Wallach, H. Larochelle, K. Grau-

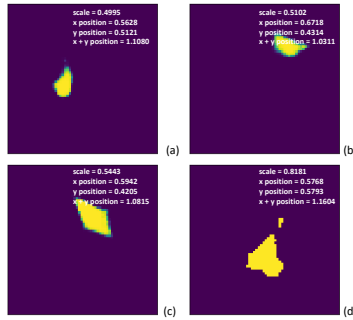

Figure 5: Generation of dSprites images under different constraints. Properties extracted via pre-trained models are illustrated at the top right corner of each image. (a)  $scale=0.5$ ,  $x$  position=0.5,  $x+y$  position = 1; (b)  $scale=0.5$ ,  $x$  position  $\in (0.7, 0.9)$ ,  $x+y$  position=1; (c)  $scale=0.5$ ,  $x$  position=0.6,  $x+y$  position=1; (d)  $scale=0.8$ ,  $x$  position=0.5,  $x+y$  position=  $\infty$

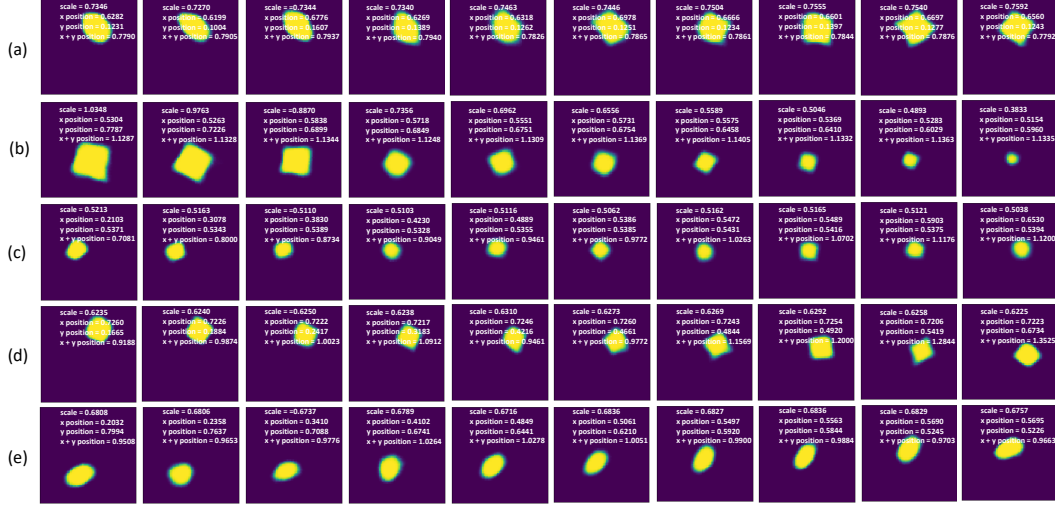

Figure 6: Generated images of corrVAE by traversing five latent variables in  $w'$  for dSprites dataset according to the mask matrix (Figure 5). The corresponding properties are illustrated at the top right corner of each image. (a) Traversing on the  $w'_1$  that controls *shape*; (b) Traversing on the  $w'_2$  that controls *size*; (c) Traversing on the  $w'_3$  that controls *x position*; (d) Traversing on the  $w'_4$  that controls *y position*; (e) Traversing on the  $w'_5$  that controls *x+y position*.

man, N. Cesa-Bianchi, and R. Garnett, editors, *Advances in Neural Information Processing Systems*, volume 31, 2018. URL <https://proceedings.neurips.cc/paper/2018/file/1ee3dfcd8a0645a25a35977997223d22-Paper.pdf>.
